# Supplementary material for: Uniform P-Doped MnMoO4 Nanosheets for Enhanced Asymmetric Supercapacitors Performance
Source: MDPI journal article supplement (doi:10.3390/molecules29091988), 2024-04-26
Supplement: s1 [file s1]

## Uniform P-Doped MnMoO<sub>4</sub> Nanosheets for Enhanced Asymmetric Supercapacitors Performance

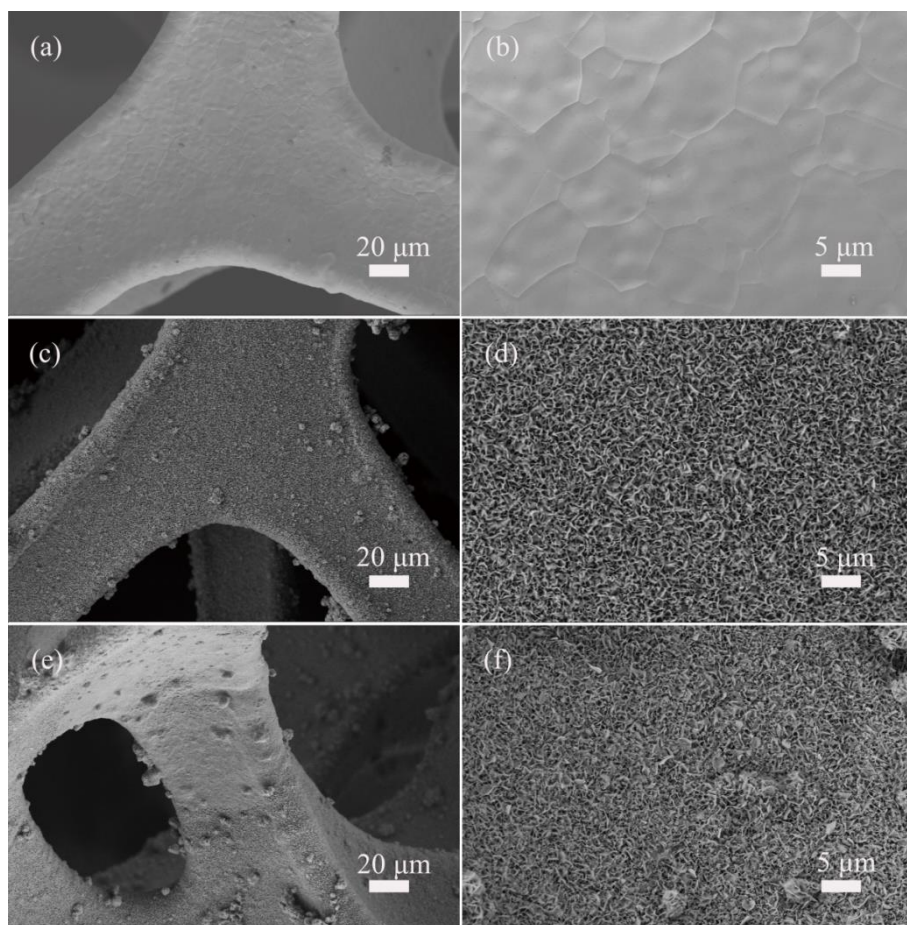

**Figure S1.** SEM images of (a, b) NF (c, d) MnMoO<sub>4</sub>·H<sub>2</sub>O and (e, f) P-MnMoO<sub>4</sub>

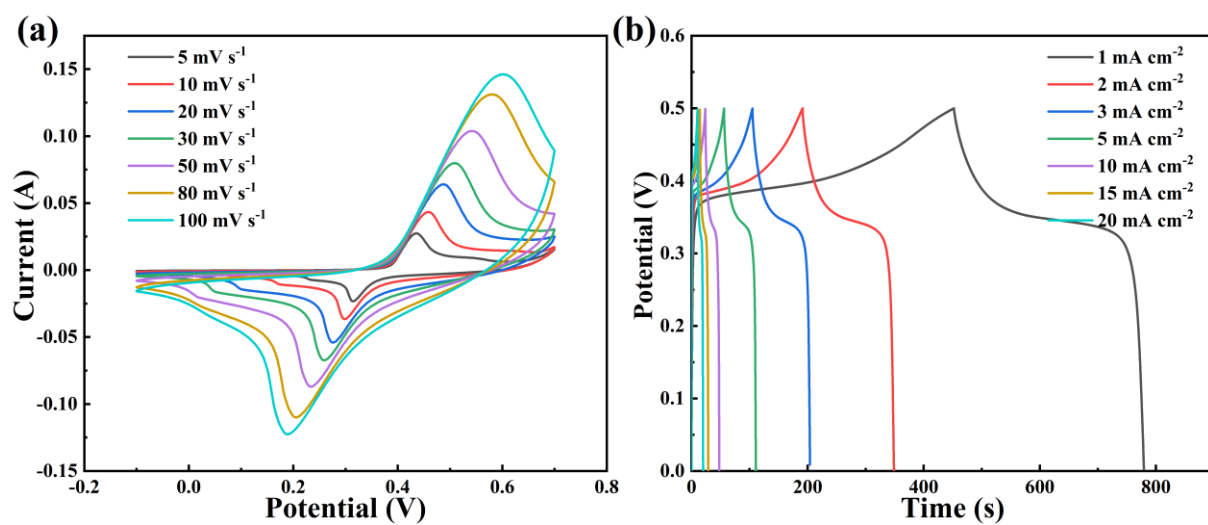

**Figure S2.** (a) CV curve of MnMoO<sub>4</sub>·H<sub>2</sub>O; (b) GCD curve

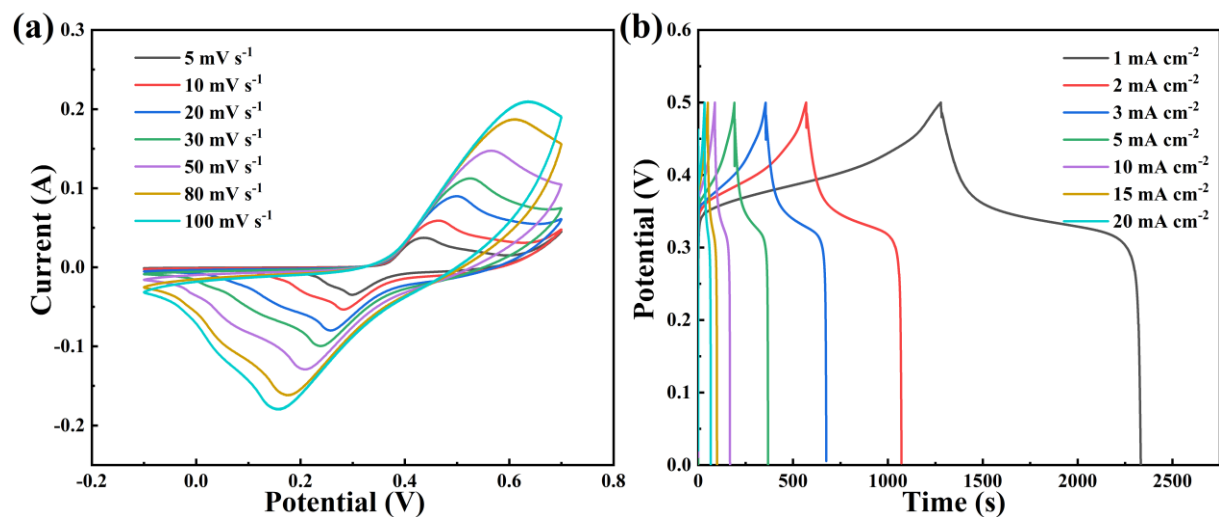

Figure S3. (a) CV curve of P-MnMoO<sub>4</sub>; (b) GCD curve

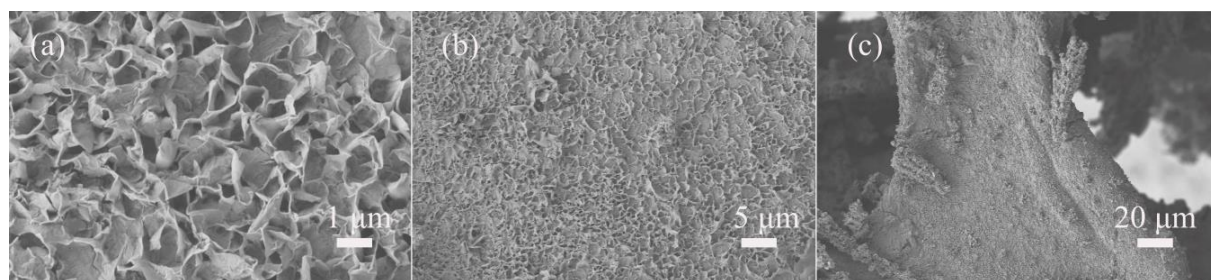

Figure S4. (a-c) SEM images of P-MnMoO<sub>4</sub> electrode material after charge/discharge cycle

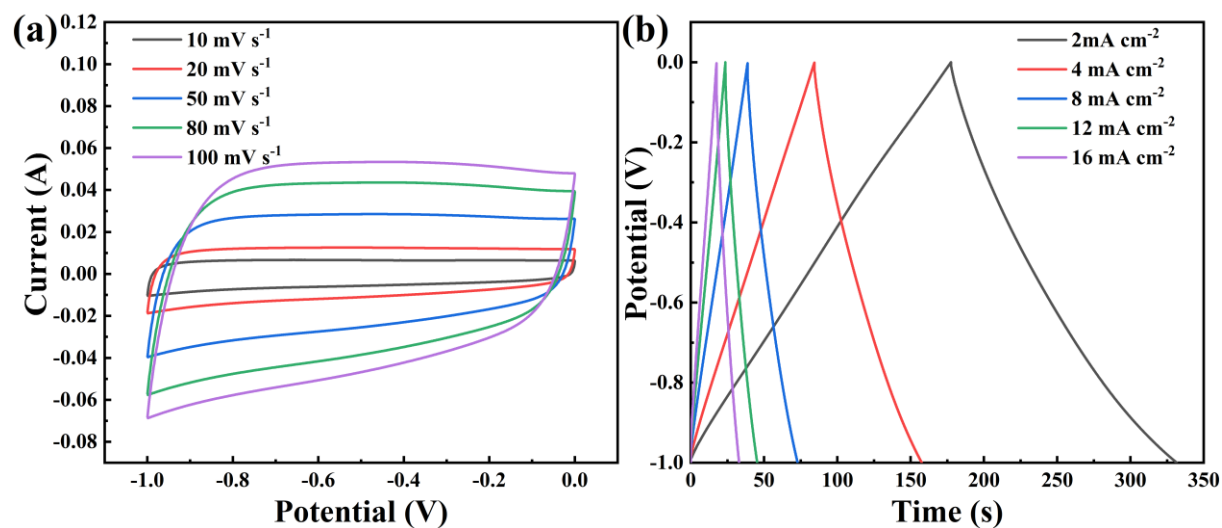

Figure S5. (a) CV curve of activated carbon; (b) GCD curve

**Table S1.** Performance comparison of hybrid supercapacitor based on MnMoO<sub>4</sub> electrode material with other reported devices.

| Electrode material                    | Electrolyte                         | Specific capacitance                                                                                | Energy density            | Power density             | Cyclic life | References |
|---------------------------------------|-------------------------------------|-----------------------------------------------------------------------------------------------------|---------------------------|---------------------------|-------------|------------|
| MnMoO <sub>4</sub> ·nH <sub>2</sub> O | 1 M NaOH                            | 1271 F g <sup>-1</sup> at 5 mV s <sup>-1</sup>                                                      | 31.6 Wh kg <sup>-1</sup>  | 935 W kg <sup>-1</sup>    | 84.5%,2000  | [1]        |
| MnMoO <sub>4</sub> /NF                | KOH/PVA                             | 0.429 F cm <sup>-2</sup> at 2 mA cm <sup>-2</sup>                                                   | 0.41 mWh cm <sup>-3</sup> | 0.41 mWh cm <sup>-3</sup> | 71.4%,10000 | [2]        |
| α-MnMoO <sub>4</sub> nanoparticles    | 2 M NaOH                            | 200 F g <sup>-1</sup> at 1.6 A g <sup>-1</sup>                                                      | 11 Wh kg <sup>-1</sup>    | 100 W kg <sup>-1</sup>    | 89.1%,1000  | [3]        |
| su-GC@ MnMoO <sub>4</sub>             | 2 M KOH                             | 528 F g <sup>-1</sup> at 2 A g <sup>-1</sup>                                                        | 35.4 Wh kg <sup>-1</sup>  | 223 W kg <sup>-1</sup>    | 98.7%,5000  | [4]        |
| α-MnMoO <sub>4</sub> /PANI            | 1 M Na <sub>2</sub> SO <sub>4</sub> | 396 F g <sup>-1</sup> at 5 mV s <sup>-1</sup>                                                       |                           |                           | 81%,500     | [5]        |
| MnMoO <sub>4</sub> @MWCNT             | 1 M KOH                             | 1017 F g <sup>-1</sup> at 1 A g <sup>-1</sup>                                                       | 18.1 Wh kg <sup>-1</sup>  | 362.4 W kg <sup>-1</sup>  |             | [6]        |
| MnMoO <sub>4</sub> /MnCO <sub>3</sub> | 2 M NaOH                            | 1311 F g <sup>-1</sup> at 1 A g <sup>-1</sup>                                                       | 116.8 Wh kg <sup>-1</sup> | 383 W kg <sup>-1</sup>    | 85%,2000    | [7]        |
| MnMoO <sub>4</sub> /NiWO <sub>4</sub> | 2 M KOH                             | 598 F g <sup>-1</sup> at 1 A g <sup>-1</sup>                                                        |                           |                           | 82%,5000    | [8]        |
| This Work (P-MnMoO <sub>4</sub> )     | 2 M KOH                             | 2.112 F cm <sup>-2</sup> at1 mA cm <sup>-2</sup><br>1760 F g <sup>-1</sup> at0.83 A g <sup>-1</sup> | 41.9 Wh kg <sup>-1</sup>  | 666.8 W kg <sup>-1</sup>  | 84.5%,10000 |            |

## References

1. Mu, X.; Zhang, Y.; Wang, H.; Huang, B.; Sun, P.; Chen, T.; Zhou, J.; Xie, E.; Zhang, Z., A high energy density asymmetric supercapacitor from ultrathin manganese molybdate nanosheets. *Electrochimica Acta* **2016**, 211, 217-224.
2. Prabakaran, P.; Arumugam, G.; Ramu, P.; Selvaraj, M.; Assiri, M. A.; Rokhum, S. L.; Arjunan, S.; Rajendran, R., Construction of hierarchical MnMoO<sub>4</sub> nanostructures on Ni foam for high-performance asymmetric supercapacitors. *Surfaces and Interfaces* **2023**, 40.
3. Senthilkumar, B.; Selvan, R. K.; Meyrick, D.; Minakshi, M., Synthesis and Characterization of Manganese Molybdate for Symmetric Capacitor Applications. *International Journal of Electrochemical Science* **2015**, 10, (1), 185-193.
4. Appiagyei, A. B.; Asiedua-Ahenkorah, L.; Bathula, C.; Kim, H.-S.; Han, S. S.; Rao, K. M.; Anang, D. A., Rational design of sucrose-derived graphitic carbon coated MnMoO<sub>4</sub> for high performance asymmetric supercapacitor. *Journal of Energy Storage* **2023**, 58.
5. Yesuraj, J.; Elumalai, V.; Bhagavathiachari, M.; Samuel, A. S.; Elaiyappillai, E.; Johnson, P. M., A facile sonochemical assisted synthesis of  $\alpha$ -MnMoO<sub>4</sub>/PANI nanocomposite electrode for supercapacitor applications. *Journal of Electroanalytical Chemistry* **2017**, 797, 78-88.
6. Bhagwan, J.; Hussain, S. K.; Krishna, B. V.; Yu, J. S., Facile synthesis of MnMoO<sub>4</sub>@MWCNT and their electrochemical performance in aqueous asymmetric supercapacitor. *Journal of Alloys and Compounds* **2021**, 856, 157874.
7. Pallavolu, M. R.; Banerjee, A. N.; Nallapureddy, R. R.; Joo, S. W., Urea-assisted hydrothermal synthesis of MnMoO<sub>4</sub>/MnCO<sub>3</sub> hybrid electrochemical electrode and fabrication of high-performance asymmetric supercapacitor. *Journal of Materials Science & Technology* **2022**, 96, 332-344.
8. Feng, X.; Huang, Y.; Chen, M.; Chen, X.; Li, C.; Zhou, S.; Gao, X., Self-assembly of 3D hierarchical MnMoO<sub>4</sub>/NiWO<sub>4</sub> microspheres for high-performance supercapacitor. *Journal of Alloys and Compounds* **2018**, 763, 801-807.
